# Supplementary material for: Comprehensive analysis of transcriptome profiles in hepatocellular carcinoma
Source: Springer Nature journal article supplement (doi:10.1186/s12967-019-2025-x), 2019-08-20
Supplement: 12967_2019_2025_MOESM1_ESM.pdf [file 12967_2019_2025_MOESM1_ESM.pdf]

# **Comprehensive Analysis of Transcriptome Profiles in Hepatocellular Carcinoma Patients**

Yu Jin<sup>1#</sup>, Wai Yeow Lee<sup>1#</sup>, Soo Ting Toh<sup>1#</sup>, Chandana Tennakoon<sup>2</sup>, Han Chong Toh<sup>3</sup>, Pierce Kah-Hoe Chow<sup>4,5</sup>, Alexander Y-F Chung<sup>5</sup>, Samuel S. Chong<sup>6,7</sup>, London L.-P- J Ooi<sup>5,8</sup>, Wing-Kin Sung<sup>2,9</sup>, Caroline G-L Lee<sup>1,3,4,\*</sup>

## **Additional file 1**

1. Methods
2. Figures S1-S8
3. Tables S1-S3

## **Methods**

### **Generation of consensus sequences for HBV genome**

The consensus HBV sequences of each genotype A-H were used as the reference genome. The consensus sequences were generated by aligning the HBV sequences of each genotype using Jalview. The number of HBV sequences with available genotype information and used for generation of each consensus sequences were 327, 503, 931, 684, 207, 110, 14 and 20 for genotype A, B, C, D, E, F, G and H respectively.

### **Mapping of sequencing reads to the genomes and fusion transcript detection**

RNA-seq libraries were first aligned to human and HBV genomes using Tophat. From the resulting alignments, read pairs that had at least one read mapped to the HBV genome or with at least one side unmapped were extracted. These read pairs were aligned with Blast to a database containing known HBV strains. Next, read pairs having at least one side mapping to an HBV strain were extracted. Chimeric reads and reads that originated from HBV were presented in this final set of reads. An in-house RNA-seq read assembler PETA was used to assemble all these reads.

The pairs of reads used in the resulting assemblies were separated into three groups; 1) read pairs where both sides were used in the same assembly; 2) reads where only one side was used in some assembly while its mate was never used; and 3) read pairs where the two sides were used in two different assemblies. The third group of reads was unreliable and discarded. Read assembly was then repeated with the remaining reads.

The first group of reads, which can lead to confident assemblies, were re-assembled using PETA. The second group of reads were aligned to the human genome using BLAST, and clustered according to the best hit given by BLAST. Two reads, which mapped within 1000 bp from each

other, were added to the same cluster. Finally multiple sequence alignment was performed using an in-house program MSA to generate consensus sequences for these clusters.

The resulting assemblies and consensus sequences were aligned to human and HBV databases using BLAST to determine whether they are chimeric, and then to determine the exact breakpoints.

Deep transcriptome sequencing of 25 pairs of HCC and adjacent non-tumor samples generated an average of 56,547,541 clean reads and 5,089,278,683 clean bases, with an average Q20 percentage of 96.76%. About 94% of the total raw reads were successfully mapped to the reference hg19 and HBV genome. Among these mapped reads, 99.97% was mapped to the hg19, while 0.03% was mapped to HBV genome (Figure S8A).

In order to assess whether the sequencing depth is sufficient, saturation curves were generated for the 50 samples sequenced. As additional reads were sampled, the number of splice junctions detected increased very rapidly at first, and reached plateau when ~40% of the reads were sampled, suggesting that the sequencing depth was sufficient (Figure S8B).

### **Evaluation of preferred viral or chromosomal sites or gene region for formation of fusion transcripts**

Based on the total number of fusion transcripts observed in the transcriptome sequencing, the same number of sites were randomly sampled *in silico* from the HBV or human genome. The region (nucleotide 1,600-1,900) in the HBV genome or human chromosome where these randomly sampled fusion sites reside were recorded. The process was repeated 1,000,000 times to generate an empirical distribution of fusion sites for the region of interest in the HBV genome or each human chromosome. Using chromosome 10 as an example, the observed number of fusion sites on chromosome 10 was 7. Based on 1,000,000 times of random samplings, there were 610

sampling cycles generating more than 7 fusion sites on chromosome 10. Hence the empirical p-value was  $6.1 \times 10^{-4}$  (610/1,000,000). After multiple test correction, FDR was found to be 0.01464, which is less than 0.05, and thus is considered statistically significant. The R Project for Statistical Computing was used to perform the random sampling and the probability calculations. Similar method was used to assess whether there was significant enrichment of breakpoints in various genic regions.

### **Pathway analysis of differentially expressed genes and genes with somatic mutations**

Differentially Expressed Genes were analyzed using Ingenuity Pathway Analysis to identify significantly enriched Canonical Pathways and Upstream Regulators. A right-tailed Fisher's Exact Test (FET) was used to test for significant overlap between the differentially expressed genes between T and NT, as well as the genes in the categories of Canonical Pathways and Upstream Regulators respectively, as defined by Ingenuity Knowledge Base<sup>TM</sup>. After multiple test correction, FDR of less than 0.01 was defined to be statistically significant for the FET.

An Activation Z-score was used to predict the activation status of the canonical pathways and upstream regulators based on the expression level of the differentially expressed genes associated with the canonical pathway and upstream regulators. The associated differentially expressed genes were compared with their expected expression level based on literature curated in Ingenuity Knowledge Base<sup>TM</sup>. An absolute Z-score above 2 was considered to be significant and this allows for the prediction of the activation or inhibition status of a pathway or regulator.

To identify the functions of genes carrying somatic mutation, the Database for Annotation, Visualization and Integrated Discovery (DAVID) was utilized for the annotation of functions.

Gene ontology (biological process – FAT, cellular compartment –FAT, molecular function-FAT) and KEGG pathway analysis were performed for the gene groups of interests. After Benjamini-Hochberg correction, FDR<0.05 was used as the cutoff for statistical significance.

### **Detection of somatic mutations**

The output BAM files from Tophat alignments were used for generating the pileup files using Samtools and the consensus of the reads covering each base were obtained. For each position where the consensus base was different from the reference (indicated by the presence of “alternative base”), statistics of the numbers of high-quality (Phred-score quality score  $\geq 50$ ) reads carrying the alternative and reference bases were computed. Only the mutation events that contain at least five high-quality alternative reads in the tumor samples and five high-quality reads with reference allele in the non-tumorous samples were determined as tumor-specific somatic mutations in this study.

### **Clinical association and survival analysis**

Most of the clinical parameters were binary variables e.g. vascular invasion and no vascular invasion. We grouped the patients with histological grade=1 or 2 as low-grade group, while those with grade=3 or 4 as high-grade group. Patients at stage I and II were grouped as early-stage, patients while the others were at late stage.

For analysis of association between clinical parameters and gene expression, we first calculated the ratio of gene expression in tumor to expression in paired non-tumor tissue i.e. T/NT ratio and performed log transformation of all the T/NT ratios. Then we compared the log ratios in two groups (E.g. patients with and without vascular invasion for each of the human genes) using Student’s t-test followed by Benjamini-Hochberg correction. Genes that exhibit significant

differences in T/NT ratios between the two groups (FDR < 0.05) were identified to be associated with clinical parameters.

Based on the presence of somatic mutations in a particular gene, we grouped the patients into two categories and built a 2×2 contingency table corresponding to a particular clinical phenotype e.g. with and without vascular invasion. FET was used to identify the association between mutations and clinical phenotype, and associations with p-value<0.05 were reported.

Cox proportional hazards modeling was employed to analyze the association between gene expression and overall survival. For each of the genes, the ratio of the gene expression in tumor to that in the adjacent non-tumor tissue was calculated for every patient and used as the explanatory variable in the Cox proportional hazards regression model.

Kaplan-Meier survival analysis was performed for identification of mutated genes associated with overall survival outcome. For each of the human genes in which mutations were identified in the tumors of at least five HCC patients, we classified the patients into two groups based on the presence of somatic mutations within the genes. Kaplan-Meier curves were plotted for the two groups and Log-rank test was used for comparison of the two survival curves. Statistical significance was determined as Log-rank p-value<0.05.

**Figure S1. Differentially expressed genes predicted to be involved in  $\geq 5$  different pathways**

**A**

|    | Number of Pathways | Gene    | FDR      | Fold Change (T/NT) | 1433 pathway | mTOR Signaling | Mitotic Role of Polo-Like Kinase | Estrogen-mediated S-Phase Entry | ATM Signaling | Role of BRCA1 in DNA Damage Response | Telomerase Signaling | Role of CHK Proteins in Cell Cycle Checkpoint Control | Cyclins and Cell Cycle Regulation | Huntington's Disease Signaling | Apoptosis Signaling | Cell Cycle:G1/S Checkpoint Regulation | Cell Cycle:G2/M DNA Damage Checkpoint Regulation |
|----|--------------------|---------|----------|--------------------|--------------|----------------|----------------------------------|---------------------------------|---------------|--------------------------------------|----------------------|-------------------------------------------------------|-----------------------------------|--------------------------------|---------------------|---------------------------------------|--------------------------------------------------|
| 1  | 7                  | CDK1    | 7.14E-05 | 18.4               |              |                |                                  |                                 |               |                                      |                      |                                                       |                                   |                                |                     |                                       |                                                  |
| 2  | 6                  | E2F1    | 8.63E-04 | 21.3               |              |                |                                  |                                 |               |                                      |                      |                                                       |                                   |                                |                     |                                       |                                                  |
| 3  | 6                  | PPM1L   | 6.64E-04 | 2.4                |              |                |                                  |                                 |               |                                      |                      |                                                       |                                   |                                |                     |                                       |                                                  |
| 4  | 6                  | PPP2R1A | 1.73E-02 | 2.1                |              |                |                                  |                                 |               |                                      |                      |                                                       |                                   |                                |                     |                                       |                                                  |
| 5  | 6                  | PPP2R3B | 8.64E-05 | 2.4                |              |                |                                  |                                 |               |                                      |                      |                                                       |                                   |                                |                     |                                       |                                                  |
| 6  | 6                  | PPP2R4  | 2.39E-05 | 2.4                |              |                |                                  |                                 |               |                                      |                      |                                                       |                                   |                                |                     |                                       |                                                  |
| 7  | 6                  | PPP2R5A | 6.50E-06 | 2.5                |              |                |                                  |                                 |               |                                      |                      |                                                       |                                   |                                |                     |                                       |                                                  |
| 8  | 6                  | PPP2R5D | 1.88E-05 | 2.5                |              |                |                                  |                                 |               |                                      |                      |                                                       |                                   |                                |                     |                                       |                                                  |
| 9  | 5                  | ATR     | 8.24E-06 | 2.2                |              |                |                                  |                                 |               |                                      |                      |                                                       |                                   |                                |                     |                                       |                                                  |
| 10 | 5                  | CDK2    | 9.76E-04 | 2.3                |              |                |                                  |                                 |               |                                      |                      |                                                       |                                   |                                |                     |                                       |                                                  |
| 11 | 5                  | CHEK2   | 5.09E-04 | 3.1                |              |                |                                  |                                 |               |                                      |                      |                                                       |                                   |                                |                     |                                       |                                                  |
| 12 | 5                  | E2F3    | 2.94E-04 | 4.1                |              |                |                                  |                                 |               |                                      |                      |                                                       |                                   |                                |                     |                                       |                                                  |
| 13 | 5                  | E2F4    | 2.78E-04 | 2.1                |              |                |                                  |                                 |               |                                      |                      |                                                       |                                   |                                |                     |                                       |                                                  |
| 14 | 5                  | E2F5    | 1.06E-02 | 3.5                |              |                |                                  |                                 |               |                                      |                      |                                                       |                                   |                                |                     |                                       |                                                  |
| 15 | 5                  | E2F6    | 7.56E-03 | 2.4                |              |                |                                  |                                 |               |                                      |                      |                                                       |                                   |                                |                     |                                       |                                                  |
| 16 | 5                  | HRAS    | 1.63E-04 | 2.3                |              |                |                                  |                                 |               |                                      |                      |                                                       |                                   |                                |                     |                                       |                                                  |
| 17 | 5                  | MAPK1   | 1.29E-05 | 2.3                |              |                |                                  |                                 |               |                                      |                      |                                                       |                                   |                                |                     |                                       |                                                  |
| 18 | 5                  | MAPK3   | 1.60E-04 | 2.5                |              |                |                                  |                                 |               |                                      |                      |                                                       |                                   |                                |                     |                                       |                                                  |
| 19 | 5                  | PRKCA   | 5.33E-05 | 2.7                |              |                |                                  |                                 |               |                                      |                      |                                                       |                                   |                                |                     |                                       |                                                  |

**B**

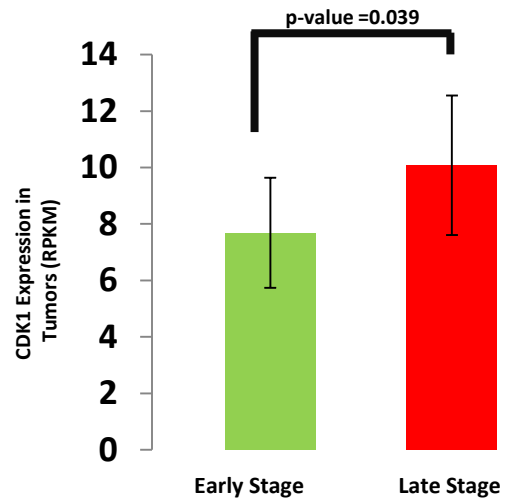

## Figure S2. Upstream regulators significantly associated with differentially expressed genes.

A Summary of upstream regulators significantly associated with differentially expressed genes.

|    | REFSEQ       | GENE NAME     | FDR (T/NT) | FC (T/NT) | Molecule Type                     | Predicted Activation State | Activation z-score | p-value of overlap | Functional Anotation of Target Genes     | Enrichment Score |
|----|--------------|---------------|------------|-----------|-----------------------------------|----------------------------|--------------------|--------------------|------------------------------------------|------------------|
| 1  | NM_005427    | <b>TP73</b>   | 4.36E-03   | 124.0     | transcription regulator           | Activated                  | 5.6                | 1.21E-03           | Regulation of Apoptosis                  | 4.96             |
| 2  | NM_021953    | <b>FOXM1</b>  | 3.72E-04   | 25.0      | transcription regulator           | Activated                  | 3.3                | 6.56E-03           | cell cycle and p53 signaling             | 4.70             |
| 3  | NM_130439    | <b>MXI1</b>   | 2.30E-02   | 7.0       | transcription regulator           | Inhibited                  | -2.4               | 2.21E-02           | metal binding                            | 0.55             |
| 4  | NM_001042483 | <b>NUPR1</b>  | 1.92E-03   | 5.2       | transcription regulator           | Inhibited                  | -7.2               | 3.27E-09           | Cell Cycle                               | 6.49             |
| 5  | NM_001291738 | <b>CD24</b>   | 5.10E-03   | 5.0       | other                             | Activated                  | 4.4                | 7.63E-03           | chromosome                               | 1.10             |
| 6  | NM_015832    | <b>MBD2</b>   | 4.93E-02   | 4.5       | transcription regulator           | Activated                  | 2.8                | 3.67E-02           | N.A.                                     | N.A.             |
| 7  | NM_005037    | <b>PPARG</b>  | 8.29E-04   | 4.1       | ligand-dependent nuclear receptor | Activated                  | 2.0                | 1.00E+00           | Extracellular Region                     | 3.21             |
| 8  | NM_003707    | <b>RUVBL1</b> | 2.62E-05   | 2.9       | transcription regulator           | Activated                  | 2.8                | 1.63E-03           | Histone,Methylation, DNA-Protein Binding | 1.95             |
| 9  | NM_001173989 | <b>RABL6</b>  | 5.96E-03   | 2.8       | other                             | Activated                  | 5.2                | 5.82E-07           | Nuclear Lumen                            | 13.03            |
| 10 | NM_006618    | <b>KDMSB</b>  | 1.10E-03   | 2.7       | transcription regulator           | Inhibited                  | -3.0               | 1.73E-04           | Cell Cycle                               | 4.32             |
| 11 | NM_001135044 | <b>MAPK9</b>  | 1.08E-02   | 2.5       | kinase                            | Activated                  | 3.0                | 8.96E-03           | N.A.                                     | N.A.             |
| 12 | NM_001278276 | <b>E2F6</b>   | 7.56E-03   | 2.4       | transcription regulator           | Inhibited                  | -3.2               | 2.88E-07           | DNA replication                          | 10.41            |
| 13 | NM_181659    | <b>NCOA3</b>  | 3.07E-03   | 2.3       | transcription regulator           | Activated                  | 2.2                | 1.71E-02           | N.A.                                     | N.A.             |
| 14 | NM_005526    | <b>HSF1</b>   | 9.02E-04   | 2.2       | transcription regulator           | Inhibited                  | -2.5               | 1.24E-04           | stress response                          | 2.74             |
| 15 | NM_012333    | <b>MYCBP</b>  | 4.57E-04   | 2.1       | transcription regulator           | Activated                  | 2.0                | 3.66E-02           | N.A.                                     | N.A.             |
| 16 | NM_001206993 | <b>NR1H4</b>  | 5.33E-05   | -2.2      | ligand-dependent nuclear receptor | Inhibited                  | -2.3               | 1.23E-01           | Xenobiotic Metabolism                    | 2.58             |
| 17 | NM_000014    | <b>A2M</b>    | 5.09E-04   | -2.3      | transporter                       | Activated                  | 2.1                | 1.52E-02           | Regulation of Apoptosis                  | 2.64             |
| 18 | NM_024773    | <b>KDM8</b>   | 1.13E-03   | -2.7      | other                             | Activated                  | 2.4                | 4.34E-04           | N.A.                                     | N.A.             |
| 19 | NM_001243514 | <b>ESRRG</b>  | 3.26E-02   | -3.2      | ligand-dependent nuclear receptor | Activated                  | 2.6                | 2.09E-02           | N.A.                                     | N.A.             |
| 20 | NM_199168    | <b>CXCL12</b> | 9.73E-05   | -6.0      | cytokine                          | Inhibited                  | -2.8               | 2.85E-01           | mutagenesis site                         | 1.75             |

B TP73 up-regulated in tumor (T) compared to non-tumor (NT) tissues.

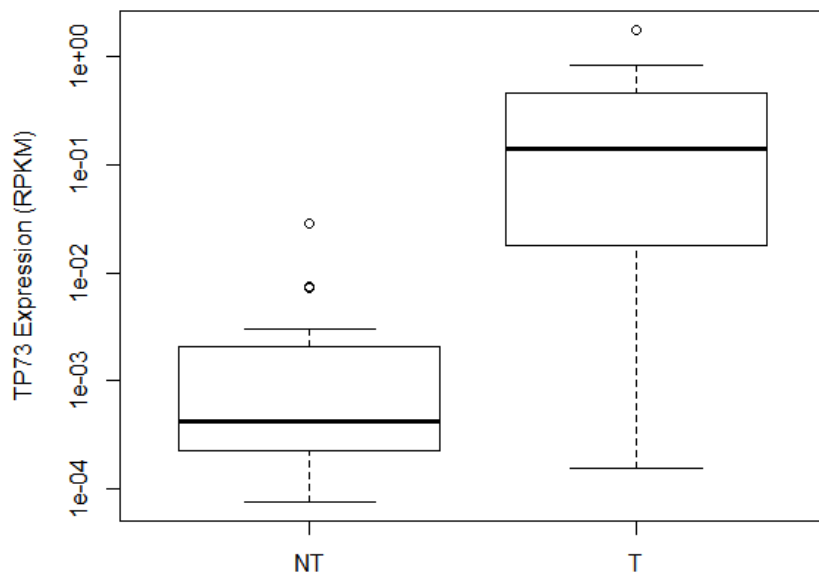



**Figure S3. Characteristics of somatic mutations in 25 HCC tumors**

**A** Number of somatic mutations in each patient

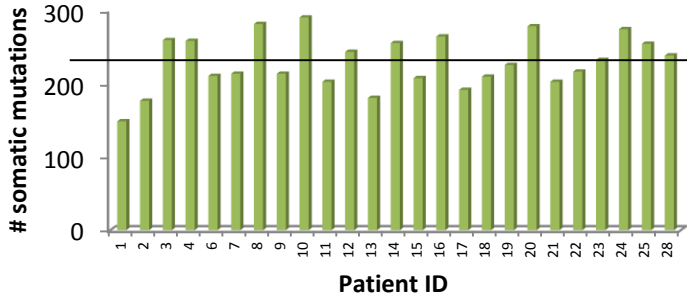

**B** Somatic mutations that affect start/stop codon, splice donor/acceptor

| Functional effect   | Gene Name    | rs number   | cDNA change  | Predicted Protein change                                                                  |
|---------------------|--------------|-------------|--------------|-------------------------------------------------------------------------------------------|
| Loss of start codon | KAT5         |             | c.2T>C       | Loss of start codon which may lead to no protein produced                                 |
|                     | UPP1         |             | c.3G>T       |                                                                                           |
|                     | ZFP62        | rs705441    | c.3G>C       |                                                                                           |
| Loss of stop codon  | LRRC57       |             | c.720A>G     | Stop codon mutated to W (*240W) which may lead to additional amino acids after stop codon |
|                     | TMEM209      |             | c.1684T>A    | Stop codon mutated to K (*562K) which may lead to additional amino acids after stop codon |
| Splice donor        | AMBP         |             | c.117+2T>A   |                                                                                           |
|                     | APOA2        | rs112346700 | c.52+2T>C    |                                                                                           |
|                     | ATP5J2-PTCD1 |             | c.13+1G>T    |                                                                                           |
|                     | HP           |             | c.265+2T>C   |                                                                                           |
|                     | SSR4         |             | n.412+1G>C   |                                                                                           |
|                     | TMEM176B     |             | c.-6+2T>G    |                                                                                           |
|                     | TXN          |             | c.-6+2G>C    |                                                                                           |
| Splice acceptor     | TXNRD2       |             | c.*65+2T>C   |                                                                                           |
|                     | BAHD1        |             | n.356-1G>C   |                                                                                           |
|                     | MFSD2A       |             | c.94-2A>T    |                                                                                           |
|                     | MYO18A       |             | c.2039-2A>G  |                                                                                           |
|                     | USP34        |             | c.10034-2A>T |                                                                                           |

**C** Pathways enriched with deleterious mutations

| Category                         | Term                                                    | # genes     | Fold Enrichment | FDR      |
|----------------------------------|---------------------------------------------------------|-------------|-----------------|----------|
| Biological Process               | Regulation of small GTPase mediated signal transduction | 33          | 3.11            | 5.64E-05 |
|                                  | Regulation of hydrolase activity                        | 34          | 2.39            | 3.50E-03 |
|                                  | Response to DNA damage stimulus                         | 34          | 2.16            | 1.61E-02 |
|                                  | Protein localization                                    | 62          | 1.67            | 1.95E-02 |
|                                  | Vesicle-mediated transport                              | 45          | 1.85            | 2.08E-02 |
|                                  | Cellular response to stress                             | 44          | 1.84            | 2.59E-02 |
| Cellular Compartment             | Chromosome organization                                 | 39          | 1.91            | 3.16E-02 |
|                                  | Non-membrane-bounded organelle                          | 151         | 1.48            | 4.72E-05 |
|                                  | Extrinsic to membrane                                   | 43          | 2.22            | 2.08E-04 |
|                                  | Cytosol                                                 | 86          | 1.65            | 2.32E-04 |
|                                  | Membrane-enclosed lumen                                 | 112         | 1.54            | 2.61E-04 |
|                                  | Cytoskeleton                                            | 87          | 1.61            | 4.18E-04 |
|                                  | Golgi apparatus                                         | 58          | 1.7             | 4.28E-03 |
|                                  | Nucleolus                                               | 48          | 1.75            | 8.61E-03 |
|                                  | Nucleoplasm                                             | 56          | 1.62            | 1.58E-02 |
|                                  | Molecular Function                                      | ATP binding | 129             | 1.99     |
| ATPase activity                  |                                                         | 41          | 2.8             | 5.94E-07 |
| Helicase activity                |                                                         | 24          | 3.9             | 3.08E-06 |
| GTPase regulator activity        |                                                         | 44          | 2.48            | 4.42E-06 |
| Cytoskeletal protein binding     |                                                         | 42          | 1.9             | 4.06E-03 |
| Protein kinase activity          |                                                         | 48          | 1.8             | 4.26E-03 |
| Phospholipid binding             |                                                         | 21          | 2.7             | 4.42E-03 |
| Enzyme activator activity        |                                                         | 31          | 2.11            | 6.42E-03 |
| ATP-dependent helicase activity  |                                                         | 14          | 3.25            | 1.18E-02 |
| Cholesterol transporter activity |                                                         | 5           | 9.49            | 3.72E-02 |

**Figure S4.** Differential gene expression of selected genes in selected HCC patients with NMD mutations

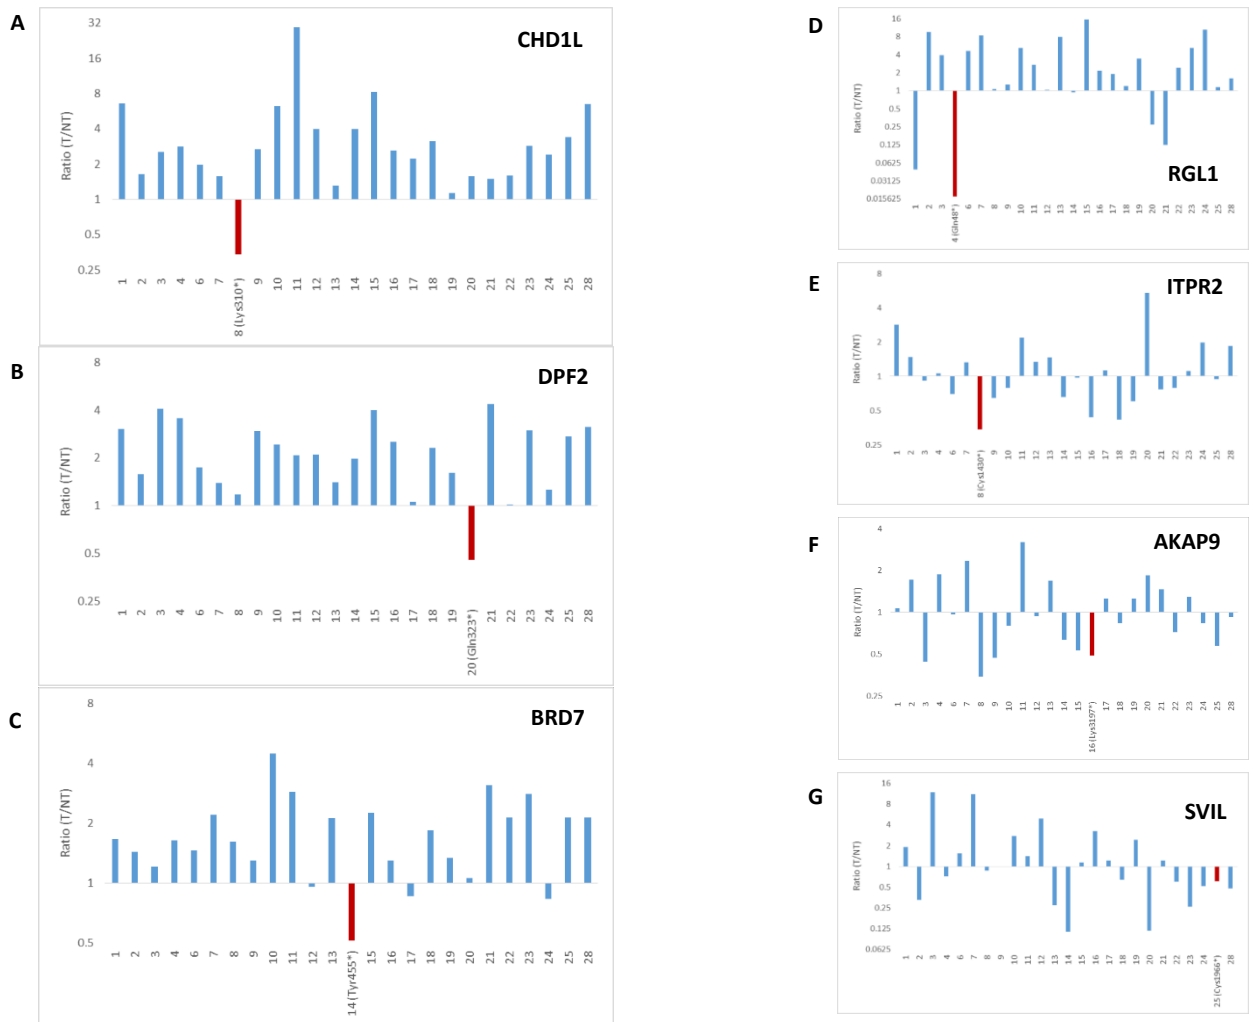

**(A)** Decreased CHD1L expression was observed in the tumor of patient 8 carrying Lys310\* mutation in CHD1L. **(B)** Decreased DPF2 expression was observed in the tumor of patient 20 carrying Gln323\* mutation in DPF2. **(C)** Decreased BRD7 expression was observed in the tumor of patient 14 carrying Tyr455\* mutation in BRD7. **(D)** Decreased RGL1 expression was observed in the tumor of patient 4 carrying Gln48\* mutation in RGL1. **(E)** Decreased ITPR2 expression was observed in the tumor of patient 8 carrying Cys1430\* mutation in ITPR2. **(F)** Decreased AKAP9 expression was observed in the tumor of patient 16 carrying Lys3197\* mutation in AKAP9. **(G)** Decreased SVIL expression was observed in the tumor of patient 25 carrying Cys1966\* mutation in SVIL.

**Figure S5. Pathways associated with recurrent mutations.**

| Category             | Term                                         | # genes | Fold Enrichment | FDR             |
|----------------------|----------------------------------------------|---------|-----------------|-----------------|
| Biological Process   | Translation                                  | 13      | 4.18            | <b>3.59E-02</b> |
|                      | Cellular protein localization                | 14      | 3.63            | <b>4.64E-02</b> |
|                      | Mitochondrial membrane organization          | 5       | 16.64           | <b>4.97E-02</b> |
| Cellular Compartment | Ribosome                                     | 12      | 5.62            | <b>1.20E-03</b> |
|                      | Intracellular non-membrane-bounded organelle | 48      | 1.86            | <b>2.00E-03</b> |
|                      | Centrosome                                   | 9       | 4.04            | <b>4.48E-02</b> |
|                      | Cytosol                                      | 25      | 1.89            | 5.92E-02        |
|                      | Microtubule cytoskeleton                     | 14      | 2.57            | 6.51E-02        |
| Molecular Function   | Structural constituent of ribosome           | 11      | 6.91            | <b>1.41E-03</b> |
| KEGG pathway         | Ribosome                                     | 10      | 10.44           | <b>2.24E-05</b> |

**Figure S6. Pathways enriched in frequently mutated genes in HCC patients**

| Category                               | Term                                      | # mutated genes | # mutations | # patients        | Genes with recurrent mutations                                       | Fold enrichment | FDR             |
|----------------------------------------|-------------------------------------------|-----------------|-------------|-------------------|----------------------------------------------------------------------|-----------------|-----------------|
| Cancer-related                         | Small cell lung cancer                    | 29              | 48          | 20                | TP53                                                                 | 1.92            | 1.72E-02        |
|                                        | Colorectal cancer                         | 24              | 37          | 20                | CTNNB1, TP53                                                         | 1.59            | 1.86E-01        |
|                                        | Pathways in cancer                        | 71              | 106         | 25                | BID, CTNNB1, TP53                                                    | 1.21            | 3.65E-01        |
|                                        | Pancreatic cancer                         | 19              | 31          | 20                | TP53                                                                 | 1.47            | 4.20E-01        |
| Signaling                              | Phosphatidylinositol signaling system     | 26              | 44          | 22                | PIP4K2B, SYNJ2                                                       | 1.96            | <b>2.27E-02</b> |
|                                        | Neurotrophin signaling pathway            | 25              | 47          | 23                | MAP3K5, TP53                                                         | 1.12            | 7.28E-01        |
|                                        | Wnt signaling pathway                     | 29              | 43          | 22                | CTNNB1, TP53                                                         | 1.07            | 7.67E-01        |
|                                        | MAPK signaling pathway                    | 50              | 76          | 23                | DDIT3, MAP3K5, STK3, TAOK2, TP53                                     | 1.04            | 7.68E-01        |
|                                        | Calcium signaling pathway                 | 26              | 35          | 20                |                                                                      | 0.82            | 9.76E-01        |
| Cellular Process                       | Focal adhesion                            | 64              | 84          | 25                | CTNNB1                                                               | 1.78            | <b>1.65E-04</b> |
|                                        | Endocytosis                               | 60              | 87          | 25                | DNM1L, HLA-C, NEDD4, PIP4K2B, RAB11FIP5                              | 1.82            | <b>3.10E-04</b> |
|                                        | Ubiquitin mediated proteolysis            | 45              | 62          | 24                | HERC2, NEDD4, UBE3C                                                  | 1.83            | <b>2.13E-03</b> |
|                                        | Cell cycle                                | 28              | 43          | 25                | MCM3, TP53                                                           | 1.25            | 5.48E-01        |
| Metabolism                             | Purine metabolism                         | 43              | 58          | 23                | PNPT1                                                                | 1.57            | 5.40E-02        |
|                                        | Inositol phosphate metabolism             | 19              | 35          | 20                | PIP4K2B, SYNJ2                                                       | 1.96            | 8.40E-02        |
| Miscellaneous                          | ECM-receptor interaction                  | 31              | 49          | 22                |                                                                      | 2.06            | <b>3.30E-03</b> |
|                                        | Tight junction                            | 37              | 49          | 23                | CTNNB1, MYH14                                                        | 1.54            | 9.98E-02        |
|                                        | Ribosome                                  | 25              | 39          | 21                | RPL15, RPL18, RPL18A, RPL27A, RPL8, RPL9, RPLP2, RPS12, RPS24, RPS27 | 1.6             | 1.79E-01        |
|                                        | ABC transporters                          | 15              | 27          | 20                | ABCA2                                                                | 1.9             | 1.86E-01        |
|                                        | Progesterone-mediated oocyte maturation   | 23              | 32          | 21                |                                                                      | 1.49            | 3.41E-01        |
|                                        | Lysosome                                  | 29              | 47          | 22                | ABCA2, GGA3, NAGPA, SGSH                                             | 1.38            | 3.64E-01        |
|                                        | Leukocyte transendothelial migration      | 28              | 36          | 21                | CTNNB1                                                               | 1.32            | 4.56E-01        |
|                                        | Regulation of actin cytoskeleton          | 47              | 67          | 23                | MYH14, PIP4K2B                                                       | 1.22            | 4.64E-01        |
|                                        | Oocyte meiosis                            | 26              | 33          | 22                |                                                                      | 1.32            | 4.65E-01        |
|                                        | Natural killer cell mediated cytotoxicity | 25              | 38          | 20                | BID, HLA-C, MICA                                                     | 1.05            | 8.04E-01        |
| Huntington's disease                   | 26                                        | 46              | 24          | HTT, NDUFB2, TP53 | 0.81                                                                 | 9.80E-01        |                 |
| Cytokine-cytokine receptor interaction | 30                                        | 36              | 20          | RTEL1             | 0.64                                                                 | 1.00E+00        |                 |



**Figure S8. Summary of sequencing data for 25 HCC patients.**

**A**

|                                              |               |        |
|----------------------------------------------|---------------|--------|
| <b>Average number of clean reads</b>         | 56,547,541    |        |
| <b>Average number of clean bases (bases)</b> | 5,089,278,683 |        |
| <b>Average Q20 percentage</b>                | 96.76%        |        |
| <b>% of reads mapped</b>                     | <b>hg19</b>   | 99.97% |
|                                              | <b>HBV</b>    | 0.03%  |

**B**

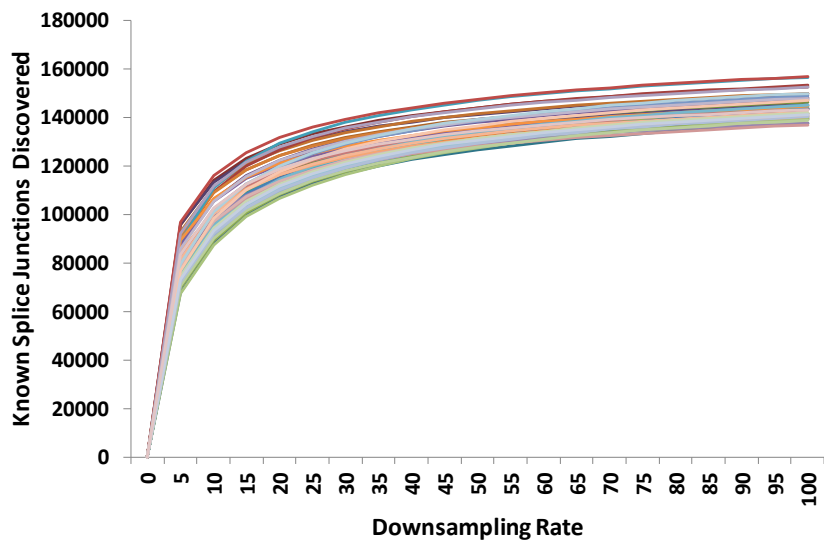

**Table S1.** Genes significantly associated with clinical characteristics.

| no | Gene     | Fold change (T/N) | p-value | Pathway                 |            |                 |               |                  |                 | Clinical Characteristics |         |                            |         |                            |         |
|----|----------|-------------------|---------|-------------------------|------------|-----------------|---------------|------------------|-----------------|--------------------------|---------|----------------------------|---------|----------------------------|---------|
|    |          |                   |         | Cell Death and Survival | Cell Cycle | DNA Replication | Cell Assembly | Cell Maintenance | Cell Morphology | Gene Expression          | RNA PTM | Edmonson Grade (Poor/Good) | p-value | Vascular Invasion (Yes/No) | P-Value |
| 1  | AFP      | 5.9               | 2.3E-02 |                         |            |                 |               |                  |                 | 64.09                    | 2.3E-02 |                            |         |                            |         |
| 2  | ARID3A   | 4.4               | 1.5E-04 |                         |            |                 |               |                  |                 | 7.67                     | 1.5E-04 |                            |         |                            |         |
| 3  | KIAA1524 | 6.5               | 2.4E-06 |                         |            |                 |               |                  |                 | 5.10                     | 2.4E-06 |                            |         |                            |         |
| 4  | KIF11    | 8.1               | 2.7E-08 |                         |            |                 |               |                  |                 | 4.09                     | 2.7E-08 |                            |         |                            |         |
| 5  | LMNB1    | 4.8               | 3.5E-07 |                         |            |                 |               |                  |                 | 3.99                     | 3.5E-07 |                            |         |                            |         |
| 6  | ATAD2    | 4.3               | 5.2E-07 |                         |            |                 |               |                  |                 | 3.70                     | 5.2E-07 |                            |         |                            |         |
| 7  | CBY1     | 2.0               | 1.8E-03 |                         |            |                 |               |                  |                 | 3.67                     | 1.8E-03 |                            |         |                            |         |
| 8  | MID1IP1  | 4.3               | 3.0E-07 |                         |            |                 |               |                  |                 | 3.58                     | 3.0E-07 |                            |         |                            |         |
| 9  | CENPJ    | 2.4               | 7.1E-04 |                         |            |                 |               |                  |                 | 3.51                     | 7.1E-04 |                            |         |                            |         |
| 10 | TPD52L2  | 3.1               | 1.2E-05 |                         |            |                 |               |                  |                 | 3.46                     | 1.2E-05 |                            |         |                            |         |
| 11 | ARHGAP19 | 2.4               | 5.3E-05 |                         |            |                 |               |                  |                 | 3.40                     | 5.3E-05 |                            |         |                            |         |
| 12 | WHSC1    | 3.4               | 1.2E-06 |                         |            |                 |               |                  |                 | 3.37                     | 1.2E-06 |                            |         |                            |         |
| 13 | BTBD3    | 2.2               | 7.5E-04 |                         |            |                 |               |                  |                 | 3.23                     | 7.5E-04 |                            |         |                            |         |
| 14 | TTLL4    | 2.7               | 2.2E-05 |                         |            |                 |               |                  |                 | 3.20                     | 2.2E-05 |                            |         |                            |         |
| 15 | RPSAP58  | 2.6               | 5.9E-05 |                         |            |                 |               |                  |                 | 3.06                     | 5.9E-05 |                            |         |                            |         |
| 16 | ARL6IP6  | 2.3               | 8.3E-05 |                         |            |                 |               |                  |                 | 3.03                     | 8.3E-05 |                            |         |                            |         |
| 17 | SEC23B   | 3.0               | 4.7E-06 |                         |            |                 |               |                  |                 | 2.93                     | 4.7E-06 |                            |         |                            |         |
| 18 | STK35    | 2.4               | 1.2E-05 |                         |            |                 |               |                  |                 | 2.92                     | 1.2E-05 |                            |         |                            |         |
| 19 | CPNE1    | 2.6               | 2.1E-05 |                         |            |                 |               |                  |                 | 2.87                     | 2.1E-05 |                            |         |                            |         |
| 20 | NCAPD2   | 3.9               | 3.1E-07 |                         |            |                 |               |                  |                 | 2.83                     | 3.1E-07 |                            |         |                            |         |
| 21 | ABHD3    | 2.1               | 6.1E-05 |                         |            |                 |               |                  |                 | 2.83                     | 6.1E-05 |                            |         |                            |         |
| 22 | KIF2A    | 3.1               | 3.7E-06 |                         |            |                 |               |                  |                 | 2.80                     | 3.7E-06 |                            |         |                            |         |
| 23 | GPR107   | 2.3               | 5.3E-05 |                         |            |                 |               |                  |                 | 2.79                     | 5.3E-05 |                            |         |                            |         |
| 24 | CPD      | 2.9               | 1.4E-06 |                         |            |                 |               |                  |                 | 2.78                     | 1.4E-06 |                            |         |                            |         |
| 25 | VPS54    | 2.0               | 1.1E-04 |                         |            |                 |               |                  |                 | 2.62                     | 1.1E-04 |                            |         |                            |         |
| 26 | LBR      | 2.1               | 7.5E-06 |                         |            |                 |               |                  |                 | 2.52                     | 7.5E-06 |                            |         |                            |         |
| 27 | ANKRD52  | 3.5               | 5.5E-08 |                         |            |                 |               |                  |                 | 2.49                     | 5.5E-08 |                            |         |                            |         |
| 28 | STRBP    | 2.4               | 8.7E-07 |                         |            |                 |               |                  |                 | 2.45                     | 8.7E-07 |                            |         |                            |         |
| 29 | POLA1    | 2.9               | 8.3E-07 |                         |            |                 |               |                  |                 | 2.45                     | 8.3E-07 |                            |         |                            |         |
| 30 | TFAP4    | 2.5               | 1.6E-06 |                         |            |                 |               |                  |                 | 2.43                     | 1.6E-06 |                            |         |                            |         |
| 31 | HNRNPC   | 2.4               | 2.0E-06 |                         |            |                 |               |                  |                 | 2.42                     | 2.0E-06 |                            |         |                            |         |
| 32 | POU2F1   | 2.5               | 1.6E-06 |                         |            |                 |               |                  |                 | 2.40                     | 1.6E-06 |                            |         |                            |         |
| 33 | ACD      | 2.1               | 1.6E-05 |                         |            |                 |               |                  |                 | 2.34                     | 1.6E-05 |                            |         |                            |         |
| 34 | HIF1AN   | 2.0               | 5.4E-05 |                         |            |                 |               |                  |                 | 2.32                     | 5.4E-05 |                            |         |                            |         |
| 35 | FNDC3B   | 2.1               | 3.1E-06 |                         |            |                 |               |                  |                 | 2.32                     | 3.1E-06 |                            |         |                            |         |
| 36 | TOPBP1   | 2.8               | 2.4E-07 |                         |            |                 |               |                  |                 | 2.30                     | 2.4E-07 |                            |         |                            |         |
| 37 | TRIP12   | 2.0               | 2.2E-05 |                         |            |                 |               |                  |                 | 2.29                     | 2.2E-05 |                            |         |                            |         |
| 38 | ZBED4    | 2.3               | 1.7E-06 |                         |            |                 |               |                  |                 | 2.23                     | 1.7E-06 |                            |         |                            |         |
| 39 | FAM168B  | 2.0               | 5.6E-06 |                         |            |                 |               |                  |                 | 2.13                     | 5.6E-06 |                            |         |                            |         |
| 40 | QSER1    | 2.1               | 2.2E-06 |                         |            |                 |               |                  |                 | 2.09                     | 2.2E-06 |                            |         |                            |         |
| 41 | IKBKAP   | 2.1               | 1.6E-06 |                         |            |                 |               |                  |                 | 2.01                     | 1.6E-06 |                            |         |                            |         |
| 42 | TULP3    | 2.4               | 4.7E-07 |                         |            |                 |               |                  |                 | 2.00                     | 4.7E-07 |                            |         |                            |         |
| 43 | U2SURP   | 2.2               | 1.2E-06 |                         |            |                 |               |                  |                 | 1.96                     | 1.2E-06 |                            |         |                            |         |
| 44 | B4GALT3  | 2.6               | 1.0E-07 |                         |            |                 |               |                  |                 | 1.96                     | 1.0E-07 |                            |         |                            |         |
| 45 | MIB1     | 2.0               | 1.4E-06 |                         |            |                 |               |                  |                 | 1.90                     | 1.4E-06 |                            |         |                            |         |
| 46 | KHSRP    | 2.2               | 4.1E-07 |                         |            |                 |               |                  |                 | 1.90                     | 4.1E-07 |                            |         |                            |         |
| 47 | MAPK1    | 2.1               | 2.3E-07 |                         |            |                 |               |                  |                 | 1.85                     | 2.3E-07 |                            |         |                            |         |
| 48 | ANAPC1   | 2.3               | 6.8E-08 |                         |            |                 |               |                  |                 | 1.84                     | 6.8E-08 |                            |         |                            |         |
| 49 | ARID4B   | 2.1               | 2.2E-07 |                         |            |                 |               |                  |                 | 1.79                     | 2.2E-07 |                            |         |                            |         |
| 50 | NCSTN    | 2.3               | 7.6E-08 |                         |            |                 |               |                  |                 | 1.75                     | 7.6E-08 |                            |         |                            |         |
| 51 | SKP2     | 3.0               | 1.0E-05 |                         |            |                 |               |                  |                 | 3.24                     | 1.0E-05 |                            |         | 13.86                      | 2.4E-02 |
| 52 | TBL1X    | 2.0               | 1.3E-03 |                         |            |                 |               |                  |                 | 3.80                     | 1.3E-03 |                            |         | 7.39                       | 2.4E-02 |
| 53 | NUP133   | 2.4               | 2.5E-08 |                         |            |                 |               |                  |                 | 1.73                     | 2.5E-08 |                            |         | 79.61                      | 4.7E-02 |
| 54 | MGST1    | -2.4              | 2.0E-04 |                         |            |                 |               |                  |                 | -3.66                    | 2.0E-04 |                            |         |                            |         |
| 55 | SLC46A3  | -2.4              | 3.2E-03 |                         |            |                 |               |                  |                 | -4.86                    | 3.2E-03 |                            |         |                            |         |
| 56 | NR1H4    | -2.5              | 1.6E-03 |                         |            |                 |               |                  |                 | -4.93                    | 1.6E-03 |                            |         |                            |         |
| 57 | APOC3    | -2.2              | 7.3E-03 |                         |            |                 |               |                  |                 | -4.98                    | 7.3E-03 |                            |         |                            |         |
| 58 | ASPDH    | -4.5              | 3.7E-05 |                         |            |                 |               |                  |                 | -5.69                    | 3.7E-05 |                            |         |                            |         |
| 59 | CYP2A6   | -11.2             | 4.7E-04 |                         |            |                 |               |                  |                 | -39.13                   | 4.7E-04 |                            |         |                            |         |
| 60 | AKR7A3   | -4.7              | 1.3E-04 |                         |            |                 |               |                  |                 | -7.17                    | 1.3E-04 |                            |         | 0.22                       | 3.3E-02 |
| 61 | SHMT1    | -2.1              | 9.0E-03 |                         |            |                 |               |                  |                 | -5.54                    | 9.0E-03 |                            |         | 0.12                       | 4.65    |
| 62 | AP2A1    | 2.01              | 2.2E-07 |                         |            |                 |               |                  |                 |                          |         |                            |         | 1849.70                    | 1.6E-02 |
| 63 | SLC30A6  | 2.44              | 1.7E-07 |                         |            |                 |               |                  |                 |                          |         |                            |         | 349.14                     | 1.1E-02 |
| 64 | ERCC2    | 2.35              | 9.3E-08 |                         |            |                 |               |                  |                 |                          |         |                            |         | 179.04                     | 1.6E-02 |
| 65 | NSL1     | 2.24              | 1.1E-08 |                         |            |                 |               |                  |                 |                          |         |                            |         | 91.27                      | 2.3E-02 |

|     |              |       |         |  |  |      |         |       |         |
|-----|--------------|-------|---------|--|--|------|---------|-------|---------|
| 66  | QPCTL        | 2.36  | 7.2E-07 |  |  |      |         | 58.48 | 4.6E-02 |
| 67  | PDZK1        | 3.37  | 1.7E-07 |  |  |      |         | 44.10 | 3.5E-02 |
| 68  | POLR2H       | 2.04  | 3.2E-04 |  |  |      |         | 39.99 | 3.7E-02 |
| 69  | RAD17        | 2.21  | 8.7E-05 |  |  |      |         | 39.85 | 1.5E-02 |
| 70  | ADAR         | 2.28  | 6.6E-08 |  |  |      |         | 33.36 | 4.6E-02 |
| 71  | ADNP         | 2.34  | 1.2E-06 |  |  |      |         | 31.98 | 3.0E-02 |
| 72  | ZNF765       | 2.39  | 1.3E-06 |  |  |      |         | 30.86 | 3.7E-02 |
| 73  | ZNF552       | 2.34  | 1.3E-05 |  |  |      |         | 30.32 | 2.9E-02 |
| 74  | SLMAP        | 2.12  | 8.0E-05 |  |  |      |         | 27.20 | 4.3E-02 |
| 75  | RFWD2        | 2.56  | 2.8E-07 |  |  |      |         | 24.27 | 4.5E-02 |
| 76  | RSRC1        | 2.69  | 5.4E-05 |  |  |      |         | 24.09 | 1.0E-02 |
| 77  | RPS6KA3      | 2.33  | 2.0E-05 |  |  |      |         | 23.47 | 2.1E-02 |
| 78  | ZNF585A      | 2.30  | 1.7E-05 |  |  |      |         | 21.17 | 3.6E-02 |
| 79  | FAM63A       | 2.01  | 8.0E-05 |  |  |      |         | 16.58 | 3.3E-02 |
| 80  | WDR5         | 2.32  | 4.3E-05 |  |  |      |         | 15.99 | 4.9E-02 |
| 81  | LOC730202    | 2.40  | 2.0E-04 |  |  |      |         | 13.86 | 3.0E-02 |
| 82  | DESI2        | 2.40  | 8.5E-06 |  |  |      |         | 12.89 | 2.5E-02 |
| 83  | UCHL5        | 3.27  | 6.9E-06 |  |  |      |         | 11.94 | 2.0E-02 |
| 84  | FAT1         | 2.63  | 1.4E-05 |  |  |      |         | 11.64 | 5.0E-02 |
| 85  | MBNL3        | 2.32  | 1.4E-03 |  |  |      |         | 7.84  | 1.5E-02 |
| 86  | YIF1B        | 2.59  | 1.3E-03 |  |  |      |         | 7.52  | 3.0E-02 |
| 87  | YY1AP1       | 4.57  | 1.2E-07 |  |  |      |         | 7.00  | 2.9E-02 |
| 88  | EIF2B4       | 2.15  | 6.1E-04 |  |  |      |         | 6.17  | 5.0E-02 |
| 89  | SAA4         | -4.22 | 3.9E-04 |  |  |      |         | 0.31  | 2.9E-02 |
| 90  | CDA          | -2.51 | 9.3E-03 |  |  |      |         | 0.27  | 1.6E-02 |
| 91  | SERPINB8     | -2.09 | 1.1E-02 |  |  |      |         | 0.24  | 4.9E-02 |
| 92  | TMEM45A      | -3.66 | 1.6E-04 |  |  |      |         | 0.24  | 2.4E-02 |
| 93  | CYP2B7P      | -4.54 | 2.2E-03 |  |  |      |         | 0.20  | 3.5E-02 |
| 94  | COLEC11      | -2.35 | 2.4E-02 |  |  |      |         | 0.19  | 2.7E-02 |
| 95  | FXD1         | -2.18 | 2.6E-02 |  |  |      |         | 0.19  | 1.7E-02 |
| 96  | ABCA8        | -2.38 | 5.0E-03 |  |  |      |         | 0.19  | 4.7E-02 |
| 97  | AKR1D1       | -3.58 | 2.8E-04 |  |  |      |         | 0.16  | 4.6E-02 |
| 98  | MCC          | -2.04 | 4.4E-03 |  |  |      |         | 0.15  | 2.3E-02 |
| 99  | IYD          | -3.34 | 1.0E-04 |  |  |      |         | 0.15  | 2.9E-02 |
| 100 | AZGP1P1      | -2.95 | 5.9E-04 |  |  |      |         | 0.14  | 1.3E-02 |
| 101 | PAIP2B       | -2.16 | 6.6E-03 |  |  |      |         | 0.13  | 1.3E-02 |
| 102 | GCH1         | -2.20 | 3.0E-04 |  |  |      |         | 0.10  | 3.0E-02 |
| 103 | AKR7L        | -2.27 | 8.2E-04 |  |  |      |         | 0.09  | 2.3E-02 |
| 104 | LOC101927755 | -2.01 | 4.5E-03 |  |  |      |         | 0.05  | 6.6E-03 |
| 105 | SLC27A2      | -2.07 | 1.9E-04 |  |  |      |         | 0.05  | 2.1E-02 |
| 106 | C14orf105    | -2.12 | 8.0E-03 |  |  |      |         | 0.04  | 1.7E-02 |
| 107 | NME1-NME2    | 2.0   | 3.3E-03 |  |  | 4.47 | 3.3E-03 |       |         |
| 108 | ZNF623       | 2.6   | 1.1E-05 |  |  | 2.94 | 1.1E-05 |       |         |
| 109 | APAF1        | 2.1   | 2.3E-04 |  |  | 2.72 | 2.3E-04 |       |         |
| 110 | TCERG1       | 2.1   | 7.2E-06 |  |  | 2.26 | 7.2E-06 |       |         |



**Table S2.** Characteristics of the HBV-Human Chimeric Transcripts

| Host Gene    | Region          | HBV Gene | Location  | # Chimeric Transcripts | Regulatory elements affected | Details                                                                                                            |
|--------------|-----------------|----------|-----------|------------------------|------------------------------|--------------------------------------------------------------------------------------------------------------------|
| TERT         | promoter        | X,PreC   | Tumor     | 3                      | TFBS                         | +VDR, CAR, PXR +VDR -E2F -Pax-5 -ZF5                                                                               |
| TERT         | promoter        | X        | Tumor     | 3                      | TFBS                         | +CP2/LBP-1c/LSF +Pax-4 +SREBP1 +SREBP-1 +ZF5 -Zic3                                                                 |
| TERT         | promoter        | X        | Tumor     | 3                      | TFBS                         | +Osf2 +myogenin / NF-1 +GR +HNF4 +HNF4alpha -Hand1:E47                                                             |
| GATA3        | non-coding exon | C        | Tumor     | 2                      |                              |                                                                                                                    |
| GATA3        | non-coding exon | C, P     | Tumor     | 2                      | ESE/ESS                      | +FB_ESE_151 +HF_ESE_791                                                                                            |
| DTNA         | intron          | X        | Tumor     | 2                      |                              |                                                                                                                    |
| DTNA         | intron          | S, P     | Tumor     | 2                      |                              |                                                                                                                    |
| SCO1         | intron          | P        | Tumor     | 2                      | ISRE                         | -GY_DS_ISRE_14                                                                                                     |
| SCO1         | intron          | C, P     | Tumor     | 2                      |                              |                                                                                                                    |
| FN1          | intron          | S, P     | Non-Tumor | 2                      |                              |                                                                                                                    |
| FN1          | intron          | S, P     | Non-Tumor | 2                      | ISRE                         | -GY_DS_ISRE_30                                                                                                     |
| PAK2         | intron          | X        | Non-Tumor | 2                      |                              |                                                                                                                    |
| PAK2         | intron          | X        | Non-Tumor | 2                      |                              |                                                                                                                    |
| MUC20        | promoter        | X        | Non-Tumor | 1                      | TFBS                         | +MYB +Nkx2-5 +Pax-2 -myogenin / NF-1 -NF-1 -PPARGamma:RXRalpha, PPARGamma -Pax-5 -Pax-6 -SREBP                     |
| SCAI         | promoter        | X        | Non-Tumor | 1                      | TFBS                         | +BRCA1:USF2 +FAC1 -CDP -Hand1:E47 -FOXJ2                                                                           |
| GLS2         | promoter        | X,PreC   | Non-Tumor | 1                      | TFBS                         | +FOXJ2 +Nkx2-5 +Pax-6 +Pax-8 +RUSH-1alpha +SREBP +TBP -Ebox -TFE -USF2 -GATA-X -MEIS1B:HOXA9 VDR, CAR, PXR -Oct-01 |
| IFT52        | promoter        | X,PreC   | Non-Tumor | 1                      | TFBS                         | +FOXJ2 +Oct-4 (POU5F1) -p300 -Pax-5 -RUSH-1alpha                                                                   |
| DHX9         | intron          | C        | Non-Tumor | 1                      | ISRE                         | +GY_DS_ISRE_147                                                                                                    |
| ADCY2        | intron          | X,PreC   | Non-Tumor | 1                      |                              |                                                                                                                    |
| CALD1        | intron          | X,PreC   | Non-Tumor | 1                      |                              |                                                                                                                    |
| COL25A1      | intron          | X,PreC   | Non-Tumor | 1                      |                              |                                                                                                                    |
| CPS1         | intron          | X,PreC   | Non-Tumor | 1                      |                              |                                                                                                                    |
| CTNNA2       | intron          | X,PreC   | Non-Tumor | 1                      |                              |                                                                                                                    |
| DAB1         | intron          | X,PreC   | Non-Tumor | 1                      |                              |                                                                                                                    |
| DENND4C      | intron          | X,PreC   | Non-Tumor | 1                      |                              |                                                                                                                    |
| FAM189A1     | intron          | X,PreC   | Non-Tumor | 1                      |                              |                                                                                                                    |
| FBXO28       | intron          | X,PreC   | Non-Tumor | 1                      |                              |                                                                                                                    |
| FCHSD2       | intron          | X,PreC   | Non-Tumor | 1                      |                              |                                                                                                                    |
| GPD2         | intron          | X,PreC   | Non-Tumor | 1                      |                              |                                                                                                                    |
| GPHN         | intron          | X,PreC   | Non-Tumor | 1                      |                              |                                                                                                                    |
| GRM7         | intron          | X,PreC   | Non-Tumor | 1                      |                              |                                                                                                                    |
| IL15RA       | intron          | X,PreC   | Non-Tumor | 1                      |                              |                                                                                                                    |
| KLHL7        | intron          | X,PreC   | Non-Tumor | 1                      | ISRE                         | -GY_DS_ISRE_136                                                                                                    |
| MAP2K5       | intron          | X,PreC   | Non-Tumor | 1                      |                              |                                                                                                                    |
| MYLK         | intron          | X,PreC   | Non-Tumor | 1                      | ISRE                         | +GY_DS_ISRE_21 -GY_DS_ISRE_71 -GY_DS_ISRE_133 -GY_DS_ISRE_136                                                      |
| NRXN1        | intron          | X,PreC   | Non-Tumor | 1                      |                              |                                                                                                                    |
| NTM          | intron          | X,PreC   | Non-Tumor | 1                      |                              |                                                                                                                    |
| PDGFD        | intron          | X,PreC   | Non-Tumor | 1                      |                              |                                                                                                                    |
| PRKD2        | intron          | X,PreC   | Non-Tumor | 1                      |                              |                                                                                                                    |
| RNF180       | intron          | X,PreC   | Non-Tumor | 1                      |                              |                                                                                                                    |
| SMAP2        | intron          | X,PreC   | Non-Tumor | 1                      |                              |                                                                                                                    |
| TJP1         | intron          | X,PreC   | Non-Tumor | 1                      |                              |                                                                                                                    |
| VAT1L        | intron          | X,PreC   | Non-Tumor | 1                      |                              |                                                                                                                    |
| WDR19        | intron          | X,PreC   | Non-Tumor | 1                      |                              |                                                                                                                    |
| MICU1        | intron          | S, P     | Non-Tumor | 1                      | ISRE                         | +GY_DS_ISRE_128                                                                                                    |
| CNGA1        | intron          | X, P     | Non-Tumor | 1                      |                              |                                                                                                                    |
| ANXA1        | intron          | X, P     | Non-Tumor | 1                      |                              |                                                                                                                    |
| ACACA        | intron          | X        | Non-Tumor | 1                      |                              |                                                                                                                    |
| ADAMTS6      | intron          | X        | Non-Tumor | 1                      |                              |                                                                                                                    |
| ADNP2        | intron          | X        | Non-Tumor | 1                      |                              |                                                                                                                    |
| ALS2CR11     | intron          | X        | Non-Tumor | 1                      |                              |                                                                                                                    |
| ANKH         | intron          | X        | Non-Tumor | 1                      |                              |                                                                                                                    |
| AVIL         | intron          | X        | Non-Tumor | 1                      |                              |                                                                                                                    |
| C12orf42     | intron          | X        | Non-Tumor | 1                      |                              |                                                                                                                    |
| FMR1         | intron          | X        | Non-Tumor | 1                      | ISRE                         | -GY_DS_ISRE_23 -GY_DS_ISRE_28                                                                                      |
| NOLC1        | intron          | X        | Non-Tumor | 1                      | ISRE                         | +GY_DS_ISRE_158                                                                                                    |
| CACYBP       | intron          | X        | Non-Tumor | 1                      | ISRE                         | -GY_DS_ISRE_21 -GY_DS_ISRE_60                                                                                      |
| CDC45        | intron          | X        | Non-Tumor | 1                      |                              |                                                                                                                    |
| CNP          | intron          | X        | Non-Tumor | 1                      |                              |                                                                                                                    |
| CYFIP2       | intron          | X        | Non-Tumor | 1                      |                              |                                                                                                                    |
| DMBT1        | intron          | X        | Non-Tumor | 1                      |                              |                                                                                                                    |
| DMD          | intron          | X        | Non-Tumor | 1                      |                              |                                                                                                                    |
| DOCK1        | intron          | X        | Non-Tumor | 1                      |                              |                                                                                                                    |
| DPP4         | intron          | X        | Non-Tumor | 1                      |                              |                                                                                                                    |
| EFHC2        | intron          | X        | Non-Tumor | 1                      |                              |                                                                                                                    |
| FLRT2        | intron          | X        | Non-Tumor | 1                      |                              |                                                                                                                    |
| FMNL2        | intron          | X        | Non-Tumor | 1                      |                              |                                                                                                                    |
| GALNT2       | intron          | X        | Non-Tumor | 1                      |                              |                                                                                                                    |
| HIVEP3       | intron          | X        | Non-Tumor | 1                      |                              |                                                                                                                    |
| KHDRBS2      | intron          | X        | Non-Tumor | 1                      |                              |                                                                                                                    |
| LOC101928135 | intron          | X        | Non-Tumor | 1                      |                              |                                                                                                                    |
| MACROD2      | intron          | X        | Non-Tumor | 1                      |                              |                                                                                                                    |
| NFKBID       | intron          | X        | Non-Tumor | 1                      |                              |                                                                                                                    |
| NR3C2        | intron          | X        | Non-Tumor | 1                      |                              |                                                                                                                    |
| OSMR-AS1     | intron          | X        | Non-Tumor | 1                      |                              |                                                                                                                    |

|           |                 |        |           |   |         |                                                |
|-----------|-----------------|--------|-----------|---|---------|------------------------------------------------|
| OTUD7A    | intron          | X      | Non-Tumor | 1 |         |                                                |
| PDE8A     | intron          | X      | Non-Tumor | 1 |         |                                                |
| PLCH1     | intron          | X      | Non-Tumor | 1 |         |                                                |
| PRIM2     | intron          | X      | Non-Tumor | 1 |         |                                                |
| RABGAP1L  | intron          | X      | Non-Tumor | 1 |         |                                                |
| SIK2      | intron          | X      | Non-Tumor | 1 |         |                                                |
| RALGPS2   | intron          | X      | Non-Tumor | 1 |         |                                                |
| RASSF1    | 5'UTR           | X      | Non-Tumor | 1 |         |                                                |
| SLC17A2   | 5'UTR           | X      | Non-Tumor | 1 | ESE/ESS | +FB_ESE_138 +FB_ESE_184 -FB_ESE_63 -HF_ESE_895 |
| SLC26A5   | intron          | X      | Non-Tumor | 1 | ISRE    | -GY_DS_ISRE_78                                 |
| SLC2A13   | intron          | C      | Non-Tumor | 1 |         |                                                |
| SLCO1A2   | intron          | X      | Non-Tumor | 1 |         |                                                |
| TMEM63A   | intron          | X      | Non-Tumor | 1 |         |                                                |
| TMEM65    | intron          | X      | Non-Tumor | 1 |         |                                                |
| WDR90     | intron          | X      | Non-Tumor | 1 |         |                                                |
| XPR1      | intron          | X      | Non-Tumor | 1 |         |                                                |
| GTF2IP1   | non-coding exon | X      | Non-Tumor | 1 | ESE/ESS | +FB_ESE_161 +HF_ESE_410 -HF_ESE_412            |
| ALB       | coding exon     | P      | Non-Tumor | 1 | ESE/ESS | -HF_ESE_1085                                   |
| AHCYL1    | intron          | C      | Tumor     | 1 |         |                                                |
| ADPRM     | intron          | C,P    | Tumor     | 1 | ISRE    | -GY_DS_ISRE_72 -GY_DS_ISRE_91 -GY_DS_ISRE_148  |
| KMT2B     | intron          | X,P    | Tumor     | 1 |         |                                                |
| DISP1     | intron          | X,PreC | Tumor     | 1 |         |                                                |
| PARP6     | intron          | X,PreC | Tumor     | 1 | ISRE    | +GY_DS_ISRE_76 +GY_DS_ISRE_84 -GY_DS_ISRE_112  |
| TGM2      | intron          | X,PreC | Tumor     | 1 |         |                                                |
| WWOX      | intron          | X,PreC | Tumor     | 1 |         |                                                |
| ZC3H3     | intron          | X,PreC | Tumor     | 1 |         |                                                |
| AIP       | intron          | X      | Tumor     | 1 |         |                                                |
| ATRNL1    | intron          | X      | Tumor     | 1 |         |                                                |
| ATRNL1    | intron          | X      | Tumor     | 1 |         |                                                |
| DDX3X     | intron          | X      | Tumor     | 1 |         |                                                |
| EEF2KMT   | intron          | X      | Tumor     | 1 |         |                                                |
| MARCH8    | intron          | X      | Tumor     | 1 |         |                                                |
| RAPGEF5   | intron          | X      | Tumor     | 1 |         |                                                |
| FAS       | intron          | X      | Tumor     | 1 | ISRE    | +GY_DS_ISRE_1 -GY_DS_ISRE_86                   |
| KRT32     | coding exon     | X      | Tumor     | 1 | ESE/ESS | +SC35_2 +HF_ESE_235                            |
| PHACTR4   | 3'UTR           | C      | Tumor     | 1 | ESE/ESS | +HF_ESS_374 -HF_ESS_427                        |
| SON       | 3'UTR           | P,S    | Tumor     | 1 | ESE/ESS | +HF_ESE_1243 -FB_ESE_213                       |
| GATA3-AS1 | non-coding exon | C,P    | Tumor     | 1 |         |                                                |



|    |               |       |         |       |         |      |         |      |         |  |       |         |      |         |  |  |  |  |  |  |
|----|---------------|-------|---------|-------|---------|------|---------|------|---------|--|-------|---------|------|---------|--|--|--|--|--|--|
| 33 | TOPBP1        | 2.30  | 2.4E-07 | 0.66  | 3.3E-05 |      |         |      |         |  |       |         |      |         |  |  |  |  |  |  |
| 34 | ZBED4         | 2.23  | 1.7E-06 | 0.72  | 2.6E-04 |      |         |      |         |  |       |         |      |         |  |  |  |  |  |  |
| 35 | FAM168B       | 2.13  | 5.6E-06 | 0.33  | 2.3E-02 |      |         |      |         |  |       |         |      |         |  |  |  |  |  |  |
| 36 | QSER1         | 2.09  | 2.2E-06 | 0.77  | 3.4E-04 |      |         |      |         |  |       |         |      |         |  |  |  |  |  |  |
| 37 | TULP3         | 2.00  | 4.7E-07 | 0.83  | 1.3E-06 |      |         |      |         |  |       |         |      |         |  |  |  |  |  |  |
| 38 | U2SURP        | 1.96  | 1.2E-06 | 0.97  | 1.8E-07 |      |         |      |         |  |       |         |      |         |  |  |  |  |  |  |
| 39 | B4GALT3       | 1.96  | 1.0E-07 | 0.82  | 3.2E-06 |      |         |      |         |  |       |         |      |         |  |  |  |  |  |  |
| 40 | MIB1          | 1.90  | 1.4E-06 | 0.32  | 3.8E-02 |      |         |      |         |  |       |         |      |         |  |  |  |  |  |  |
| 41 | KHSRP         | 1.90  | 4.1E-07 | 0.56  | 5.6E-04 |      |         |      |         |  |       |         |      |         |  |  |  |  |  |  |
| 42 | MAPK1         | 1.85  | 2.3E-07 | 0.41  | 1.2E-02 |      |         |      |         |  |       |         |      |         |  |  |  |  |  |  |
| 43 | ANAPC1        | 1.84  | 6.8E-08 | 1.33  | 9.5E-06 |      |         |      |         |  |       |         |      |         |  |  |  |  |  |  |
| 44 | ARID4B        | 1.79  | 2.2E-07 | 1.04  | 1.1E-06 |      |         |      |         |  |       |         |      |         |  |  |  |  |  |  |
| 45 | NCSTN         | 1.75  | 7.6E-08 | 0.38  | 7.2E-03 |      |         |      |         |  |       |         |      |         |  |  |  |  |  |  |
| 46 | SKP2          | 3.24  | 1.0E-05 | 0.47  | 6.0E-05 |      |         |      |         |  | 13.86 | 2.4E-02 | 1.44 | 3.5E-04 |  |  |  |  |  |  |
| 47 | NUP133        | 1.73  | 2.5E-08 | 0.67  | 4.4E-04 |      |         |      |         |  | 79.61 | 4.7E-02 | 1.34 | 8.0E-02 |  |  |  |  |  |  |
| 48 | SEC23B        | 2.93  | 4.7E-06 | 0.23  | 1.2E-01 |      |         |      |         |  |       |         |      |         |  |  |  |  |  |  |
| 49 | TRIP12        | 2.29  | 2.2E-05 | 0.31  | 1.3E-01 |      |         |      |         |  |       |         |      |         |  |  |  |  |  |  |
| 50 | MGST1         | -3.66 | 2.0E-04 | -0.20 | 1.1E-02 |      |         |      |         |  |       |         |      |         |  |  |  |  |  |  |
| 51 | SLC46A3       | -4.86 | 3.2E-03 | -0.39 | 1.7E-07 |      |         |      |         |  |       |         |      |         |  |  |  |  |  |  |
| 52 | APOC3         | -4.98 | 7.3E-03 | -0.17 | 2.5E-04 |      |         |      |         |  |       |         |      |         |  |  |  |  |  |  |
| 53 | ASPDH         | -5.69 | 3.7E-05 | -0.32 | 8.9E-08 |      |         |      |         |  |       |         |      |         |  |  |  |  |  |  |
| 54 | CYP2A6        | -39.1 | 4.7E-04 | -0.19 | 8.0E-10 |      |         |      |         |  |       |         |      |         |  |  |  |  |  |  |
| 55 | SHMT1         | -5.54 | 9.0E-03 | -0.47 | 9.9E-08 |      |         |      |         |  | 0.12  | 4.65    | 0.85 | 2.1E-02 |  |  |  |  |  |  |
| 56 | AKR7A3        | -7.17 | 1.3E-04 | -0.20 | 1.5E-04 |      |         |      |         |  | 0.22  | 3.3E-02 | 0.88 | 5.2E-03 |  |  |  |  |  |  |
| 57 | NR1H4         | -4.93 | 1.6E-03 | -0.22 | 1.1E-01 |      |         |      |         |  |       |         |      |         |  |  |  |  |  |  |
| 58 | WHSC1         | 3.37  | 1.2E-06 |       |         |      |         |      |         |  |       |         |      |         |  |  |  |  |  |  |
| 59 | RPSAP58       | 3.06  | 5.9E-05 |       |         |      |         |      |         |  |       |         |      |         |  |  |  |  |  |  |
| 60 | IKBKAP        | 2.01  | 1.6E-06 |       |         |      |         |      |         |  |       |         |      |         |  |  |  |  |  |  |
| 61 | TBL1X         | 3.80  | 1.3E-03 | -0.20 | 2.0E-01 |      |         |      |         |  | 7.39  | 2.4E-02 | 1.36 | 2.1E-02 |  |  |  |  |  |  |
| 62 | NME1-<br>NME2 |       |         |       |         | 4.47 | 3.3E-03 | 0.35 | 1.8E-02 |  |       |         |      |         |  |  |  |  |  |  |
| 63 | ZNF623        |       |         |       |         | 2.94 | 1.1E-05 | 0.26 | 2.3E-01 |  |       |         |      |         |  |  |  |  |  |  |
| 64 | APAF1         |       |         |       |         | 2.72 | 2.3E-04 | 0.48 | 7.4E-02 |  |       |         |      |         |  |  |  |  |  |  |
| 65 | TCERG1        |       |         |       |         | 2.26 | 7.2E-06 | 0.39 | 9.0E-02 |  |       |         |      |         |  |  |  |  |  |  |
| 66 | ADAR          |       |         |       |         |      |         |      |         |  | 33.36 | 4.6E-02 | 1.41 | 1.4E-02 |  |  |  |  |  |  |
| 67 | ADNP          |       |         |       |         |      |         |      |         |  | 31.98 | 3.0E-02 | 1.58 | 2.2E-03 |  |  |  |  |  |  |
| 68 | AP2A1         |       |         |       |         |      |         |      |         |  | 1850  | 1.6E-02 | 1.44 | 3.8E-02 |  |  |  |  |  |  |
| 69 | DESI2         |       |         |       |         |      |         |      |         |  | 12.89 | 2.5E-02 | 1.36 | 1.8E-02 |  |  |  |  |  |  |
| 70 | EIF2B4        |       |         |       |         |      |         |      |         |  | 6.17  | 5.0E-02 | 2.62 | 1.4E-06 |  |  |  |  |  |  |
| 71 | ERCC2         |       |         |       |         |      |         |      |         |  | 179   | 1.6E-02 | 1.52 | 1.1E-02 |  |  |  |  |  |  |
| 72 | NSL1          |       |         |       |         |      |         |      |         |  | 91.27 | 2.3E-02 | 1.55 | 1.2E-02 |  |  |  |  |  |  |
| 73 | POLR2H        |       |         |       |         |      |         |      |         |  | 39.99 | 3.7E-02 | 1.64 | 2.5E-04 |  |  |  |  |  |  |
| 74 | RSRC1         |       |         |       |         |      |         |      |         |  | 24.09 | 1.0E-02 | 1.63 | 1.0E-02 |  |  |  |  |  |  |
| 75 | SLC30A6       |       |         |       |         |      |         |      |         |  | 349   | 1.1E-02 | 1.91 | 2.8E-04 |  |  |  |  |  |  |
| 76 | WDR5          |       |         |       |         |      |         |      |         |  | 15.99 | 4.9E-02 | 1.48 | 1.4E-02 |  |  |  |  |  |  |
| 77 | YIF1B         |       |         |       |         |      |         |      |         |  | 7.52  | 3.0E-02 | 1.66 | 6.1E-05 |  |  |  |  |  |  |

|     |                  |  |  |  |  |  |              |                |             |                |
|-----|------------------|--|--|--|--|--|--------------|----------------|-------------|----------------|
| 78  | YY1AP1           |  |  |  |  |  | <b>7.00</b>  | <b>2.9E-02</b> | <b>1.66</b> | <b>1.3E-03</b> |
| 79  | ZNF765           |  |  |  |  |  | <b>30.86</b> | <b>3.7E-02</b> | <b>4.02</b> | <b>2.1E-04</b> |
| 80  | ABCA8            |  |  |  |  |  | <b>0.19</b>  | <b>4.7E-02</b> | <b>0.80</b> | <b>2.5E-02</b> |
| 81  | AKR1D1           |  |  |  |  |  | <b>0.16</b>  | <b>4.6E-02</b> | <b>0.88</b> | <b>5.2E-03</b> |
| 82  | IYD              |  |  |  |  |  | <b>0.15</b>  | <b>2.9E-02</b> | <b>0.69</b> | <b>1.1E-03</b> |
| 83  | PAIP2B           |  |  |  |  |  | <b>0.13</b>  | <b>1.3E-02</b> | <b>0.80</b> | <b>4.2E-02</b> |
| 84  | SAA4             |  |  |  |  |  | <b>0.31</b>  | <b>2.9E-02</b> | <b>0.92</b> | <b>2.7E-02</b> |
| 85  | FAT1             |  |  |  |  |  | <b>11.64</b> | <b>5.0E-02</b> | 1.08        | 3.8E-01        |
| 86  | PDZK1            |  |  |  |  |  | <b>44.10</b> | <b>3.5E-02</b> | 1.02        | 8.2E-01        |
| 87  | QPCTL            |  |  |  |  |  | <b>58.48</b> | <b>4.6E-02</b> | 1.23        | 9.0E-02        |
| 88  | RAD17            |  |  |  |  |  | <b>39.85</b> | <b>1.5E-02</b> | 1.57        | 5.7E-02        |
| 89  | RFWD2            |  |  |  |  |  | <b>24.27</b> | <b>4.5E-02</b> | 1.34        | 6.0E-02        |
| 90  | RPS6KA3          |  |  |  |  |  | <b>23.47</b> | <b>2.1E-02</b> | 1.18        | 1.0E-01        |
| 91  | SLMAP            |  |  |  |  |  | <b>27.20</b> | <b>4.3E-02</b> | 1.48        | 6.4E-02        |
| 92  | UHL5             |  |  |  |  |  | <b>11.94</b> | <b>2.0E-02</b> | 1.31        | 8.3E-02        |
| 93  | ZNF552           |  |  |  |  |  | <b>30.32</b> | <b>2.9E-02</b> | 1.23        | 2.6E-01        |
| 94  | ZNF585A          |  |  |  |  |  | <b>21.17</b> | <b>3.6E-02</b> | 1.88        | 8.7E-02        |
| 95  | AKR7L            |  |  |  |  |  | <b>0.09</b>  | <b>2.3E-02</b> | 0.85        | 1.3E-01        |
| 96  | COLEC11          |  |  |  |  |  | <b>0.19</b>  | <b>2.7E-02</b> | 0.96        | 5.2E-01        |
| 97  | FXD1             |  |  |  |  |  | <b>0.19</b>  | <b>1.7E-02</b> | 0.93        | 1.1E-01        |
| 98  | GCH1             |  |  |  |  |  | <b>0.10</b>  | <b>3.0E-02</b> | 0.93        | 4.0E-01        |
| 99  | SLC27A2          |  |  |  |  |  | <b>0.05</b>  | <b>2.1E-02</b> | 0.90        | 5.9E-02        |
| 100 | FAM63A           |  |  |  |  |  | <b>16.58</b> | <b>3.3E-02</b> |             |                |
| 101 | LOC73020<br>2    |  |  |  |  |  | <b>13.86</b> | <b>3.0E-02</b> |             |                |
| 102 | CYP2B7P          |  |  |  |  |  | <b>0.20</b>  | <b>3.5E-02</b> |             |                |
| 103 | AZGP1P1          |  |  |  |  |  | <b>0.14</b>  | <b>1.3E-02</b> |             |                |
| 104 | LOC10192<br>7755 |  |  |  |  |  | <b>0.05</b>  | <b>6.6E-03</b> |             |                |
| 105 | MBNL3            |  |  |  |  |  | <b>7.84</b>  | <b>1.5E-02</b> | 0.98        | 7.6E-01        |
| 106 | C14orf105        |  |  |  |  |  | <b>0.04</b>  | <b>1.7E-02</b> | 1.20        | 6.2E-02        |
| 107 | CDA              |  |  |  |  |  | <b>0.27</b>  | <b>1.6E-02</b> | 1.06        | 3.4E-01        |
| 108 | MCC              |  |  |  |  |  | <b>0.15</b>  | <b>2.3E-02</b> | 1.14        | 3.5E-01        |
| 109 | SERPINB8         |  |  |  |  |  | <b>0.24</b>  | <b>4.9E-02</b> | 1.14        | 3.2E-01        |
| 110 | TMEM45A          |  |  |  |  |  | <b>0.24</b>  | <b>2.4E-02</b> | <b>1.18</b> | <b>6.3E-03</b> |

Higher expression of genes associated with poor prognosis are highlighted in red ( $p$ -value $<0.05$ ) and pink ( $p$ -value $>0.05$ ) while lower expression of genes associated with poor prognosis are highlighted in dark ( $p$ -value $<0.05$ ) and light ( $p$ -value $>0.05$ ) green, respectively.  $P$ -values $<0.05$  were labelled as bold.
